# Supplementary material for: Adaptive Phage Therapy for the Prevention of Recurrent Nosocomial Pneumonia: Novel Protocol Description and Case Series
Source: MDPI journal article supplement (doi:10.3390/antibiotics12121734), 2023-12-14
Supplement: s1 [file s1]

**Table S1.** Antibiotic sensitivity and resistance markers of *K. pneumoniae* and *A. baumannii* isolated from patient 92/23's bronchoalveolar lavage sample. Determination of antibiotic sensitivity was performed on a BD Phoenix-100 automated bacteriological analyzer (BDBiosciences, San Jose, CA, USA) and data interpretation was conducted according to the installed EUCAST protocols.

| Antibiotic                     | <i>K. pneumoniae</i>                      |            | <i>A. baumannii</i>           |             |
|--------------------------------|-------------------------------------------|------------|-------------------------------|-------------|
|                                | Susceptibility                            | MIC        | Susceptibility                | MIC         |
| Amikacin                       | R                                         | 16 mg/L    | R                             | >32 mg/L    |
| Amoxicillin/Clavulanate        | R                                         | >32/2 mg/L | -                             | -           |
| Ampicillin                     | R                                         | >16 mg/L   | -                             | -           |
| Gentamicin                     | S                                         | ≤2 mg/L    | R                             | >8 mg/L     |
| Imipenem                       | R                                         | >8 mg/L    | R                             | >8 mg/L     |
| Levofloxacin                   | R                                         | >4 mg/L    | R                             | >2 mg/L     |
| Piperacillin/Tazobactam        | R                                         | >32/4 mg/L | -                             | -           |
| Tobramycin                     | R                                         | >8 mg/L    | -                             | -           |
| Trimethoprim/ Sulfamethoxazole | S                                         | ≤2/38 mg/L | R                             | >8/152 mg/L |
| Phosphomycin                   | S                                         | ≤16 mg/L   | -                             | -           |
| Cefazolin                      | R                                         | >32 mg/L   | -                             | -           |
| Ceftazidime                    | R                                         | >16 mg/L   | -                             | -           |
| Ceftriaxone                    | R                                         | >4 mg/L    | -                             | -           |
| Ciprofloxacin                  | R                                         | >1 mg/L    | R                             | >1 mg/L     |
| Ertapenem                      | R                                         | >2 mg/L    | -                             | -           |
| Meropenem                      | R                                         | >8 mg/L    | R                             | >8 mg/L     |
| Resistance marker              | Extended-spectrum beta-lactamase (ESBL)   |            | Carbapenemase producer (CARB) |             |
|                                | Potential carbapenemase producer (ALERT1) |            | -                             |             |

MIC—minimum inhibitory concentration; R—resistant; S—sensitive.

**Table S2.** Antibiotic sensitivity and resistance markers of *K. pneumoniae*, *A. baumannii* and *P. aeruginosa* isolated from patient 62/22's bronchoalveolar lavage sample. Determination of antibiotic sensitivity was performed on a BD Phoenix-100 automated bacteriological analyzer (BDBiosciences, USA) and data interpretation was conducted according to the installed EUCAST protocols.

| Antibiotic                          | <i>A. baumannii</i> |                                                | <i>K. pneumoniae</i> |            | <i>P. aeruginosa</i> |            |
|-------------------------------------|---------------------|------------------------------------------------|----------------------|------------|----------------------|------------|
|                                     | Susceptibility      | MIC                                            | Susceptibility       | MIC        | Susceptibility       | MIC        |
| Amikacin                            | R                   | >32 mg/L                                       | S                    | ≤8 mg/L    | S                    | 16 mg/L    |
| Gentamicin                          | R                   | >8 mg/L                                        | R                    | >8 mg/L    | -                    | -          |
| Imipenem                            | R                   | >8 mg/L                                        | R                    | >8 mg/L    | R                    | >8 mg/L    |
| Levofloxacin                        | R                   | >2 mg/L                                        | R                    | >2 mg/L    | R                    | >2 mg/L    |
| Meropenem                           | R                   | >8 mg/L                                        | R                    | >8 mg/L    | R                    | >8 mg/L    |
| Trimethoprim/ Sul-<br>famethoxazole | S                   | <2/38 mg/L                                     | S                    | <2/38 mg/L | -                    | -          |
| Ciprofloxacin                       | R                   | >1 mg/L                                        | R                    | >1 mg/L    | R                    | >1 mg/L    |
| Piperacillin/ Tazo-<br>bactam       | -                   | -                                              | R                    | >16/4 mg/L | R                    | >16/4 mg/L |
| Cefepime                            | -                   | -                                              | R                    | >8 mg/L    | R                    | >8 mg/L    |
| Ceftazidime                         | -                   | -                                              | R                    | >8 mg/L    | R                    | >8 mg/L    |
| Cefuroxime                          | -                   | -                                              | R                    | >16 mg/L   | -                    | -          |
| Amoxicillin/ Clavu-<br>lanate       | -                   | -                                              | R                    | >16/2 mg/L | -                    | -          |
| Ampicillin                          | -                   | -                                              | R                    | >16 mg/L   | -                    | -          |
| Tigecycline                         | -                   | -                                              | S                    | 2 mg/L     | -                    | -          |
| Cefazolin                           | -                   | -                                              | R                    | >32 mg/L   | -                    | -          |
| Ceftriaxone                         | -                   | -                                              | R                    | >4 mg/L    | -                    | -          |
| Ertapenem                           | -                   | -                                              | R                    | >1 mg/L    | -                    | -          |
| Resistance marker                   | -                   | Extended-spectrum beta-lac-<br>tamase (ESBL)   |                      | -          | -                    | -          |
|                                     | -                   | Potential carbapenemase pro-<br>ducer (ALERT1) |                      | -          | -                    | -          |

MIC—minimum inhibitory concentration; R—resistant; S—sensitive.

**Table S3.** Antibiotic sensitivity and resistance markers of *S. aureus* isolated from patient 62/22's bronchoalveolar lavage sample. Determination of antibiotic sensitivity was performed on a BD Phoenix-100 automated bacteriological analyzer (BDBiosciences, USA) and data interpretation was conducted according to the installed EUCAST protocols.

| Antibiotic                                                | <i>S. aureus</i> |            | Antibiotic                          | <i>S. aureus</i> |               |
|-----------------------------------------------------------|------------------|------------|-------------------------------------|------------------|---------------|
|                                                           | Susceptibility   | MIC        |                                     | Susceptibility   | MIC           |
| Levofloxacin                                              | R                | >4 mg/L    | Rifampin                            | R                | >2 mg/L       |
| Ciprofloxacin                                             | R                | >4 mg/L    | Teicoplanin                         | S                | ≤0.5 mg/L     |
| Mupirocin                                                 | I                | ≤256 mg/L  | Tetracycline                        | R                | >2 mg/L       |
| Vancomycin                                                | S                | 1 mg/L     | Tigecycline                         | S                | 0.5 mg/L      |
| Gentamicin                                                | R                | >4 mg/L    | Tobramycin                          | R                | >4 mg/L       |
| Daptomycin                                                | S                | 1 mg/L     | Trimethoprim/ Sulfa-<br>methoxazole | S                | <0.5/9.5 mg/L |
| Clindamycin                                               | R                | >1 mg/L    | Phosphomycin                        | S                | ≤16 mg/L      |
| Linezolid                                                 | S                | 2 mg/L     | Fucidin                             | S                | ≤0.5 mg/L     |
| Moxifloxacin                                              | R                | >2 mg/L    | Quinupristin/ Dal-<br>fopristin     | S                | ≤0.5 mg/L     |
| Oxacillin                                                 | R                | >2 mg/L    | Chloramphenicol                     | R                | >16 mg/L      |
| Penicillin                                                | R                | >0.25 mg/L | Erythromycin                        | R                | >4 mg/L       |
| Methicillin-resistant <i>Staphylococcus aureus</i> (MRSA) |                  |            |                                     |                  |               |
| Resistance marker                                         |                  |            |                                     |                  |               |
| MecA-mediated resistant <i>Staphylococcus</i>             |                  |            |                                     |                  |               |
| <i>Staphylococcus</i> MLSb phenotype                      |                  |            |                                     |                  |               |

MIC—minimum inhibitory concentration; R—resistant; S—sensitive; I—intermediate.

**Table S4.** Antibiotic sensitivity and resistance markers of *K. pneumoniae* and *A. baumannii* isolated from patient 847/21's bronchoalveolar lavage sample. Determination of antibiotic sensitivity was performed on a BD Phoenix-100 automated bacteriological analyzer (BDBiosciences, USA) and data interpretation was conducted according to the installed EUCAST protocols.

| Antibiotic                     | <i>K. pneumoniae</i>                      |             | <i>A. baumannii</i> |            |
|--------------------------------|-------------------------------------------|-------------|---------------------|------------|
|                                | Susceptibility                            | MIC         | Susceptibility      | MIC        |
| Amikacin                       | R                                         | >32 mg/L    | R                   | >32 mg/L   |
| Amoxicillin/Clavulanate        | R                                         | >32/2 mg/L  | -                   | -          |
| Ampicillin                     | R                                         | >16 mg/L    | -                   | -          |
| Gentamicin                     | R                                         | >8 mg/L     | R                   | >8 mg/L    |
| Imipenem                       | R                                         | >8 mg/L     | S                   | 0.5 mg/L   |
| Levofloxacin                   | R                                         | >4 mg/L     | R                   | >2 mg/L    |
| Piperacillin/ Tazobactam       | R                                         | >32/4 mg/L  | -                   | -          |
| Tigecycline                    | I                                         | 4 mg/L      |                     |            |
| Tobramycin                     | R                                         | >8 mg/L     |                     |            |
| Trimethoprim/ Sulfamethoxazole | R                                         | >8/152 mg/L | S                   | ≤2/38 mg/L |
| Phosphomycin                   | S                                         | 32 mg/L     |                     |            |
| Cefazolin                      | R                                         | >32 mg/L    | -                   | -          |
| Ceftazidime                    | R                                         | >16 mg/L    | -                   | -          |
| Ceftriaxone                    | R                                         | >4 mg/L     | -                   | -          |
| Ciprofloxacin                  | R                                         | >1 mg/L     | R                   | >1 mg/L    |
| Ertapenem                      | R                                         | >2 mg/L     | -                   | -          |
| Meropenem                      | R                                         | >8 mg/L     | S                   | 1 mg/L     |
| Resistance marker              | Extended-spectrum beta-lactamase (ESBL)   |             | -                   |            |
|                                | Potential carbapenemase producer (ALERT1) |             | -                   |            |
|                                |                                           |             |                     |            |

MIC—minimum inhibitory concentration; R—resistant; S—sensitive; I—intermediate.
